1 **Title: Tailoring and optimizing fatty acid production by oleaginous yeasts through the**  
2 **systematic exploration of their physiological fitness**

3 Zeynep Efsun Duman-Özdamar<sup>1,2,4</sup>, Vitor A.P. Martins dos Santos<sup>1,2,3</sup>, Jeroen Hugenholtz<sup>4</sup>,  
4 Maria Suarez-Diez<sup>2\*</sup>

5 <sup>1</sup>Bioprocess Engineering, Wageningen University & Research, 6708 PB, Wageningen, the  
6 Netherlands

7 <sup>2</sup>Laboratory of Systems and Synthetic Biology, Wageningen University & Research, 6708 WE,  
8 Wageningen, the Netherlands

9 <sup>3</sup>LifeGlimmer GmbH, Berlin, 12163, Germany

10 <sup>4</sup>Wageningen Food & Biobased Research, Wageningen University & Research, 6708 WE,  
11 Wageningen, The Netherlands

12 E-mail: maria.suarezdiez@wur.nl

13 **Background:** The use of palm oil for our current needs is unsustainable. Replacing palm oil  
14 with oils produced by microbes through the conversion of sustainable feedstocks is a promising  
15 alternative. However, there are major technical challenges that must be overcome to enable this  
16 transition. Foremost among these challenges is the stark increase in lipid accumulation and  
17 production of higher content of specific fatty acids. Therefore, there is a need for more in-depth  
18 knowledge and systematic exploration of the oil productivity of the oleaginous yeasts. In this  
19 study, we cultivated *Cutaneotrichosporon oleaginosus* and *Yarrowia lipolytica* at various C/N  
20 ratios and temperatures in a defined medium with glycerol as carbon source and urea as nitrogen  
21 source. We ascertained the synergistic effect between various C/N ratios of a defined medium  
22 at different temperatures with Response Surface Methodology (RSM) and explored the  
23 variation in fatty acid composition through Principal Component Analysis.

24 **Results:** By applying RSM, we determined a temperature of 30 °C and a C/N ratio of 175 g/g  
25 to enable maximal oil production by *C. oleaginosus* and a temperature of 21 °C and a C/N ratio  
26 of 140 g/g for *Y. lipolytica*. We increased production by 71 % and 66 % respectively for each  
27 yeast compared to the average lipid accumulation in all tested conditions. Modulating  
28 temperature enabled us to steer the fatty acid compositions. Accordingly, switching from higher  
29 temperature to lower cultivation temperature shifted the production of oils from more saturated  
30 to unsaturated by 14 % in *C. oleaginosus* and 31 % in *Y. lipolytica*. Higher cultivation  
31 temperatures resulted in production of even longer saturated fatty acids, 3 % in *C. oleaginosus*  
32 and 1.5 % in *Y. lipolytica*.

33 **Conclusions:** In this study, we provided the optimum C/N ratio and temperature for *C.*  
34 *oleaginosus* and *Y. lipolytica* by RSM. Additionally, we demonstrated that lipid accumulation  
35 of both oleaginous yeasts was significantly affected by the C/N ratio and temperature.  
36 Furthermore, we systematically analyzed the variation in fatty acids composition and proved  
37 that changing the C/N ratio and temperature steer the composition. We have further established  
38 these oleaginous yeasts as platforms for production of tailored fatty acids.

39 **Keywords:** Oleaginous yeasts, microbial oil, Response Surface Methodology, carbon to  
40 nitrogen ratio, lipid accumulation.

## 41 **Introduction**

42 The use of plant-derived oils, especially palm oil, is increasing at an alarming rate. This is  
43 happening in part as a replacement for fossil foils, but mostly as they are cheap sources of many  
44 useful components. The oils and fatty acids derived from palm trees are used in food, feed,  
45 chemical, personal care, and cosmetic products for health benefits, sensorial reasons (texture,  
46 flavor), to extend shelf-life, and as surfactants or emulsifiers [1–3]. As a result, palm tree groves  
47 are rapidly replacing the original tropical forests, and other original and traditional vegetation

48 in many Asian, South American, and African countries. This replacement is not only  
49 threatening the local ecosystem but is also having a major effect on the local livelihoods, as it  
50 causes deforestation and contributes to climate change [4,5]. Despite some responsible actions  
51 that have been taken, among them fighting against deforestation driven by RSPO (Roundtable  
52 on Sustainable Palm Oil), the use of palm oil remains controversial [6]. To that end, developing  
53 a sustainable alternative to fatty acids and oils is urgent and of utmost interest.

54 Oil-producing yeasts, referred to as oleaginous yeasts, have strong potential as sustainable  
55 alternatives for lipid production in various industrial applications [7]. *Yarrowia lipolytica* and  
56 *Cutaneotrichosporon oleaginosus* also known as *Apiotrichum curvatum*, *Cryptococcus*  
57 *curvatus*, *Trichosporon cutaneum*, *Trichosporon oleaginosus*, and *Cutaneotrichosporon*  
58 *curvatum* are reported among the top five most well-known oil-producing yeasts. *C.*  
59 *oleaginosus* and *Y. lipolytica* can accumulate oils up to 70% and 40% of their biomass  
60 respectively [8–10]. Lipid accumulation in oleaginous yeasts is induced by limiting specific  
61 nutrients such as nitrogen, phosphate, and sulphur. Nitrogen limitation or, in other words, a  
62 high C/N ratio in the growth medium, has been observed to be the most effective lipid induction  
63 strategy [9]. As reported by Ykema et al., after passing the critical C/N of 11 g/g, the oleaginous  
64 yeast starts to accumulate oils by re-routing the excess carbon to be stored as lipids [11,12].  
65 Under nitrogen limiting conditions, the produced fatty acid composition has been reported to  
66 be 25% palmitic acid (C16:0), 10% stearic acid (C18:0), 57% oleic acid (C18:1), and 7%  
67 linoleic acid (C18:2) by *C. oleaginosus* [13] and 15% C16:0, 13% C18:0, 51% C18:1, and 21%  
68 C18:2 by *Y. lipolytica* [14]. This composition is comparable to that of palm oil. Furthermore,  
69 these yeasts can use a broad range of carbon sources, such as glucose, xylose, glycerol, sucrose,  
70 and lactose. They can also use more complex and inexpensive side streams such as crude  
71 glycerol from bioethanol production or whey permeate as a feedstock, which is significant to  
72 reduce raw materials cost [15–17]. Moreover, *Y. lipolytica* is non-pathogenic and regarded as

73 food-grade yeast, thus its oil can be used for food-related applications [18,19]. Due to these  
74 advantages, oleaginous yeasts are flagged as attractive microbial-cell factories to sustain a bio-  
75 based circular economy for industrial implementation. However, from an economic point of  
76 view, the lipid production process of oleaginous yeasts still requires substantial optimization  
77 for industrial purposes. Koutinas et al. [20] reported that implementation of microbial oil in  
78 industrial applications is strongly dependent on the final microbial oil concentrations and lipid  
79 productivity [19]. For *C. oleaginosus*, it has been calculated that the process is only  
80 economically feasible if lipid accumulation reaches approximately 85 % (w/w).

81 Identifying and designing optimal production conditions is a challenging step in developing  
82 bioconversion systems since these cultivation conditions play a crucial role in productivity [21].  
83 For at least two decades, efforts have been made to design the optimum growth medium and  
84 fermentation conditions to boost the lipid accumulation as well as to sustain the growth of  
85 oleaginous yeasts [22–24]. One of the most efficient strategies to systematically identify  
86 optimum production conditions is through the Response Surface Methodology (RSM). This  
87 method decreases experimental time and laborious work compared to the one-factor-at-a-time  
88 (OFAT). Whereas OFAT only allows changing one of the considered factors in each of the  
89 experiments, RSM provides a design on which multiple parameters are changed at each  
90 experimental run. Moreover, RSM aims to predict the observed response, by reliably estimating  
91 the experimental variability [25]. For instance, Awad et al. assessed the effect of various carbon  
92 and nitrogen sources on the physiology of *C. oleaginosus* via RSM [26]. In another example,  
93 Cui et al. focused on the effect of temperature and pH on lipid content and the growth on crude  
94 glycerol [27]. Additionally, Canonico et al. reported optimum C/N ratio and time to maximize  
95 lipid production of *Y. lipolytica* [17]. However, no studies have focussed on the synergistic  
96 effect between the C/N ratio of a defined medium and cultivation parameters.

97 In addition to the optimized lipid productivity of oleaginous yeasts, tailoring the composition  
98 of produced lipids is important for increasing economic competitiveness. For instance, the  
99 longer fatty acids, such as oleic acid, lauric acid, and palmitic acid are heavily used in home  
100 and personal care products due to their cleaning/surfacting activities. Polyunsaturated fatty  
101 acids (PUFAs) such as linolenic acid supply various health properties. Ochsenreither et al. [19]  
102 reported that temperature and the composition of the medium lead to variation in fatty acid  
103 composition. Therefore, analyzing the fatty acid compositions under different cultivation  
104 conditions will provide us valuable information that will enable us to devise strategies to tailor  
105 fatty acid compositions.

106 Thus, in this study, we aimed to further develop *C. oleaginosus* and *Y. lipolytica* as microbial  
107 cell factories for the improved production of lipids and lipids with higher content of specific  
108 fatty acids. The first set of experiments was designed to assess the variance between the fatty  
109 acid composition produced by *C. oleaginosus* and *Y. lipolytica* at various C/N ratios and  
110 temperatures. We extensively studied the variance in fatty acids composition via PCA.  
111 Additionally, we performed another set of experiments to broaden the current experimental  
112 region for RSM and determined the optimized C/N ratio and temperature for *C. oleaginosus*  
113 and *Y. lipolytica*.

## 114 **Materials and Methods**

### 115 ***Yeast Strains and Pre-culture Preparation***

116 *Cutaneotrichosporon oleaginosus* ATCC 20509 and *Yarrowia lipolytica* DSM 1345 were  
117 maintained on Yeast extract Peptone Dextrose (YPD) agar plates containing 10 g/L yeast  
118 extract, 20 g/L peptone, 20 g/L glucose, 20 g/L agar. The maintained cultures were stored at 4  
119 °C for up to a week. The inoculum was prepared by transferring a single colony of the

120 oleaginous yeasts into 10 mL YPD broth (10 g/L yeast extract, 20 g/L peptone, 20 g/L glucose,  
121 20 g/L) in 50 mL tubes and incubated at 30 °C, 250 rpm for 18 h in a shaking incubator.

### 122 ***Cultivation Conditions***

123 *C. oleaginosus* and *Y. lipolytica* were grown in defined media consisting of glycerol as a carbon  
124 source and urea as a nitrogen source. The medium was adapted from Meester et al. [28] with  
125 modifications. In addition to the variation in carbon to nitrogen ration, the medium contained  
126 2.7 g/L KH<sub>2</sub>PO<sub>4</sub>, 1.79 g/L NaH<sub>2</sub>PO<sub>4</sub>·7H<sub>2</sub>O, 0.2 g/L MgSO<sub>4</sub>·7H<sub>2</sub>O, 0.2 g/L MgSO<sub>4</sub>·7H<sub>2</sub>O, 0.1  
127 g/L EDTA with the pH 5.5 as well as the trace elements: 40 mg/L CaCl<sub>2</sub>·2H<sub>2</sub>O, 5.5 mg/L  
128 FeSO<sub>4</sub>·7H<sub>2</sub>O, 5.2 mg/L citric acid·H<sub>2</sub>O, 1 mg/L ZnSO<sub>4</sub>·7H<sub>2</sub>O, 0.76 mg/L MnSO<sub>4</sub>·H<sub>2</sub>O, 10 µL/L  
129 H<sub>2</sub>SO<sub>4</sub> (36N).

### 130 ***Experimental Design***

131 The C/N ratio varied from 30:1 (g/g) to 300:1 (g/g) by mixing 4 – 40 g carbon/L with 0.13 g  
132 nitrogen/L for both oleaginous yeasts. After that, prepared cultures were incubated at different  
133 temperatures (15 °C, 25 °C, 30 °C, and 35 °C), 250 rpm for 96 or 144 hours. For the  
134 experimental design, the C/N ratio (X<sub>1</sub>) and temperature (X<sub>2</sub>) were selected as variables. Low  
135 levels and high levels for C/N ratio and temperature are C/N 30, C/N 120, and 15 °C, 35 °C.  
136 The coded values of independent variables were calculated by considering the high and low  
137 levels together with the real values:

$$138 \quad \text{Coded value} = \frac{\text{real value} - \left( \frac{\text{high level value} + \text{low level value}}{2} \right)}{\frac{1}{2} \times (\text{high value} - \text{low value})}$$

139 and are presented in Table 1.

140 **Table 1.** Levels of two independent variables employed in RSM in terms of real and coded  
141 values for *C. oleaginosus* and *Y. lipolytica*.

| Levels and coded values | Real values                       |                                    |
|-------------------------|-----------------------------------|------------------------------------|
|                         | C/N ratio (g/g)<br>X <sub>1</sub> | Temperature (°C)<br>X <sub>2</sub> |
| -1.0                    | 30                                | 15                                 |
| -0.3                    | 60                                | -                                  |
| 0.0                     | 75                                | 25                                 |
| 0.5                     | -                                 | 30                                 |
| 1.0                     | 120                               | 35                                 |
| 3.7                     | 240                               | -                                  |
| 5.0                     | 300                               | -                                  |

142

### 143 ***Determination of Biomass***

144 The growth of oleaginous yeasts was monitored every 24 h by measuring the absorbance at  
145 600 nm (OD<sub>600</sub>). A calibration curve was plotted with the absorbance versus the dry cell weight  
146 for *C. oleaginosus* and *Y. lipolytica* (Figure S1). The dry cell was obtained as follows: (1) 5 mL  
147 of culture was centrifuged at 3200 g for 15 mins, (2) the cells were washed twice with 10 mL  
148 of deionized water (3) and freeze-dried.

### 149 ***Identification of lipids and fatty acid composition***

150 The total fatty acids and the fatty acid composition were determined quantitatively. The samples  
151 were prepared by mixing 20-25 mg freeze-dried yeast cells with 2 mL of 15% H<sub>2</sub>SO<sub>4</sub> in  
152 methanol and 2 mL of chloroform containing methyl pentanoate as an internal standard. The  
153 samples were incubated for 4 h at 85-95 °C and cooled on ice for 5 min, 1 mL of distilled water  
154 was added. Following the phase separation by centrifugation at 2200 g for 5 min, the organic  
155 phase was collected from the bottom of the tube and dried with Na<sub>2</sub>SO<sub>4</sub>. Subsequently, The fatty  
156 acid methyl esters (FAME) were analyzed with a gas chromatograph (Brand, City, Country)

157 equipped with a Zebtron ZB-FAME column (30 m x 0.25 mm x 0.20 µm; Phenomenex,  
158 Torrance, CA, The US). The yeast's oil content was calculated from the internal standard.

### 159 ***Computational Analysis***

160 All computational analysis was performed with R version 4.0.2 [29].

161 *Principal Component Analysis (PCA)* was carried out on the fatty acid profiles by the statistics  
162 function `prcomp` within R [30]. The correlation biplots of the principal component scores and  
163 the loading vectors were plotted through R `ggplot2` package [31].

164 *Response Surface Methodology (RSM)* was performed by the `rsm` package, and the contour  
165 plots were generated with the R `pers` or `cont` functions [32]. The relationship between the  
166 responses and factors was expressed by the second-order polynomial equation:

$$167 \quad Y = \beta_o + \sum \beta_i x_i + \sum \beta_{ii} x_i^2 + \sum \beta_{ij} x_i x_j .$$

168  $Y$  represents the predicted response,  $\beta_o$  is the interception coefficient,  $\beta_i$  is the linear coefficient,  
169  $\beta_{ii}$  is the quadratic coefficient and  $\beta_{ij}$  is the interaction coefficient,  $X_i$  is the independent  
170 variable,  $X_i^2$  is the squared effect, and  $X_i X_j$  is the interaction effect. The quality of the  
171 regression equations was assessed according to the coefficient of determination ( $R^2$ ) and lack  
172 of fit F-test. Statistical analysis of the model was performed using Analysis of Variance  
173 (ANOVA) and  $p < 0.05$  was considered significant. Optimal levels of the C/N ratio and  
174 temperature were given as stationary points via RSM.

### 175 **Results**

176 In total, 10 experiments were conducted for *C. oleaginosus* and 9 experiments for *Y. lipolytica*.  
177 The biomass concentration of *C. oleaginosus* and *Y. lipolytica* varied from 1.24 g/L to 5.54 g/L  
178 and 2.34 to 4.52 g/L, lipid content ranged from 3.62 % to 47.41 % and 3.35 % and 18.51 % for  
179 all tested conditions (Tables 2 and 3). While the highest lipid content was obtained at C/N 120  
180 at 30 °C for *C. oleaginosus*, it reached the maximum point at C/N 140 at 25 °C in *Y. lipolytica*.



181 Incubating *C. oleaginosus* at 15 °C slightly decreased the biomass and lipid content compared  
182 to the other tested temperatures. On the other hand, decreasing the C/N ratio reduced the  
183 biomass concentration of *Y. lipolytica*.

184 **Table 2.** Biomass density and lipid content of *C. oleaginosus* at different C/N ratios and  
185 temperatures.

| C (g/L) | C/N (g/g) | Temperature (°C) | Biomass (g/L) | Lipid content (% g/g) |
|---------|-----------|------------------|---------------|-----------------------|
| 4       | 30        | 15               | 1.24 ± 0.07   | 10.71 ± 0.93          |
| 16      | 120       | 15               | 2.61 ± 0.24   | 18.09 ± 1.38          |
| 32      | 240       | 15               | 2.36 ± 0.21   | 3.62 ± 0.32           |
| 4       | 30        | 30               | 5.43 ± 0.08   | 31.16 ± 2.54          |
| 8       | 60        | 30               | 5.18 ± 0.08   | 38.48 ± 1.61          |
| 16      | 120       | 30               | 5.54 ± 0.16   | 47.41 ± 0.70          |
| 32      | 240       | 30               | 4.43 ± 0.16   | 44.12 ± 1.06          |
| 40      | 300       | 30               | 5.33 ± 0.21   | 37.83 ± 1.99          |
| 4       | 30        | 35               | 2.56 ± 0.03   | 28.95 ± 1.08          |
| 16      | 120       | 35               | 2.54 ± 0.16   | 38.92 ± 0.73          |

186

187 **Table 3.** Biomass density and lipid content of *Y. lipolytica* at different C/N ratios and  
188 temperatures.

| C (g/L) | C/N (g/g) | Temperature (°C) | Biomass (g/L) | Lipid content (% g/g) |
|---------|-----------|------------------|---------------|-----------------------|
| 4       | 30        | 15               | 2.62 ± 0.08   | 7.91 ± 0.49           |
| 16      | 120       | 15               | 4.40 ± 0.08   | 15.91 ± 0.07          |
| 4       | 30        | 30               | 2.45 ± 0.16   | 4.00 ± 0.24           |
| 16      | 120       | 30               | 4.52 ± 0.14   | 14.26 ± 1.09          |
| 4       | 30        | 35               | 2.34 ± 0.11   | 3.35 ± 0.33           |
| 16      | 120       | 35               | 3.12 ± 0.13   | 9.25 ± 0.06           |
| 9.75    | 75        | 25               | 3.01 ± 0.13   | 15.29 ± 0.41          |
| 9.75    | 75        | 25               | 3.06 ± 0.09   | 15.01 ± 0.17          |
| 18.2    | 140       | 25               | 4.18 ± 0.14   | 18.51 ± 0.96          |

189 ***Development of Regression Models and ANOVA***

190 C/N ratio and temperature as coded variables, and lipid content and biomass as responses were  
191 analyzed with RSM. The relation was fitted by second-order polynomial equations to obtain  
192 the regression equation models (Table 4). These models represent the empirical relationships  
193 between the biomass density, lipid content of cells, and the variables (C/N ratio ( $X_1$ ) and  
194 temperature ( $X_2$ )) in coded units. These regression models suggest that both linear and quadratic  
195 effects of C/N ratio and temperature significantly affected the lipid content of *C. oleaginosus*  
196 and *Y. lipolytica* (Table 4). However, interaction of C/N ratio and temperature has no significant  
197 effect on any considered responses of *Y. lipolytica*. When the growth of *C. oleaginosus* is not  
198 significantly affected by the C/N ratio, the combined effect of the C/N ratio and temperature  
199 has a significant effect. On the other hand, only the linear effect of investigated factors  
200 significantly affected the growth of *Y. lipolytica*.

201 **Table 4.** Regression equations, statistics of regression equations for lipid content and biomass  
 202 of *C. oleaginosus* and *Y. lipolytica*.

| <i>C. oleaginosus</i>                                                                                             |          |          |     | <i>Y. lipolytica</i>                                                                                       |          |          |     |
|-------------------------------------------------------------------------------------------------------------------|----------|----------|-----|------------------------------------------------------------------------------------------------------------|----------|----------|-----|
| Dependent variable: Lipid content % (w/w)                                                                         |          |          |     |                                                                                                            |          |          |     |
| $Y(\text{Lipid content})$<br>$= 39.26 + 4.85 X_1$<br>$+ 10.08 X_2 + 2.59 X_1 X_2$<br>$- 1.38 X_1^2 - 14.01 X_2^2$ |          |          |     | $Y(\text{Lipid content})$<br>$= 14.47 + 4.30 X_1 - 3.12 X_2$<br>$- 0.28 X_1 X_2 - 1.50 X_1^2 - 4.03 X_2^2$ |          |          |     |
| Source                                                                                                            | Estimate | p-values |     | Source                                                                                                     | Estimate | p-values |     |
| <b>Model</b>                                                                                                      | 39.26    | < e-15   | *** | <b>Model</b>                                                                                               | 14.47    | < e-15   | *** |
| <b>X<sub>1</sub></b>                                                                                              | 4.85     | < e-08   | *** | <b>X<sub>1</sub></b>                                                                                       | 4.30     | < e-10   | *** |
| <b>X<sub>2</sub></b>                                                                                              | 10.08    | < e-12   | *** | <b>X<sub>2</sub></b>                                                                                       | -3.12    | < e-07   | *** |
| <b>X<sub>1</sub>:X<sub>2</sub></b>                                                                                | 2.59     | < e-07   | *** | <b>X<sub>1</sub>:X<sub>2</sub></b>                                                                         | -0.28    | 0.480    |     |
| <b>X<sub>1</sub><sup>2</sup></b>                                                                                  | -1.38    | < e-09   | *** | <b>X<sub>1</sub><sup>2</sup></b>                                                                           | -1.50    | 0.011    | *   |
| <b>X<sub>2</sub><sup>2</sup></b>                                                                                  | -14.01   | < e-08   | *** | <b>X<sub>2</sub><sup>2</sup></b>                                                                           | -4.03    | < e-05   | *** |
| Dependent variable: Biomass (g/L)                                                                                 |          |          |     |                                                                                                            |          |          |     |
| $Y(\text{Biomass}) = 6.12 + 0.11 X_1 + 0.36 X_2$<br>$- 0.17 X_1 X_2 - 0.02 X_1^2$<br>$- 3.91 X_2^2$               |          |          |     | $Y(\text{Biomass}) = 3.17 + 0.71 X_1 - 0.33 X_2$<br>$- 0.13 X_1 X_2 - 0.14 X_1^2 - 0.12 X_2^2$             |          |          |     |
| Source                                                                                                            | Estimate | p-values |     | Source                                                                                                     | Estimate | p-values |     |
| <b>Model</b>                                                                                                      | 6.12     | < e-15   | *** | <b>Model</b>                                                                                               | 3.17     | < e-15   | *** |
| <b>X<sub>1</sub></b>                                                                                              | 0.11     | 0.210    |     | <b>X<sub>1</sub></b>                                                                                       | 0.71     | < e-09   | *** |
| <b>X<sub>2</sub></b>                                                                                              | 0.36     | 0.005    | **  | <b>X<sub>2</sub></b>                                                                                       | -0.33    | 0.005    | **  |
| <b>X<sub>1</sub>:X<sub>2</sub></b>                                                                                | -0.17    | 0.005    | **  | <b>X<sub>1</sub>:X<sub>2</sub></b>                                                                         | -0.13    | 0.238    |     |
| <b>X<sub>1</sub><sup>2</sup></b>                                                                                  | -0.02    | 0.323    |     | <b>X<sub>1</sub><sup>2</sup></b>                                                                           | -0.14    | 0.344    |     |
| <b>X<sub>2</sub><sup>2</sup></b>                                                                                  | -3.91    | < e-13   | *** | <b>X<sub>2</sub><sup>2</sup></b>                                                                           | -0.12    | 0.500    |     |

203

204

205 **Table 5.** Evaluating the significance of regression models by ANOVA.

| <i>C. oleaginosus</i>                                                                                                             |                       |            |             |         |           | <i>Y. lipolytica</i>                                                                                            |            |             |         |           |
|-----------------------------------------------------------------------------------------------------------------------------------|-----------------------|------------|-------------|---------|-----------|-----------------------------------------------------------------------------------------------------------------|------------|-------------|---------|-----------|
| Source                                                                                                                            | Lipid content % (w/w) |            |             |         |           |                                                                                                                 |            |             |         |           |
|                                                                                                                                   | Degrees of Freedom    | Sum Square | Mean Square | F-Value | p-Value   | Degrees of Freedom                                                                                              | Sum Square | Mean Square | F-Value | p-Value   |
| FO(X1, X2)                                                                                                                        | 2                     | 4181.0     | 2090.50     | 356.93  | < 2.2e-16 | 2                                                                                                               | 562.80     | 281.40      | 141.65  | 6.459e-13 |
| TWI (X1, X2)                                                                                                                      | 1                     | 497.2      | 497.20      | 84.89   | 2.374e-09 | 1                                                                                                               | 1.15       | 1.15        | 0.58    | 0.4561    |
| PQ ( X1, X2)                                                                                                                      | 2                     | 1022.5     | 511.27      | 87.29   | 9.709e-12 | 2                                                                                                               | 128.23     | 64.11       | 32.27   | 3.936e-07 |
| Residual                                                                                                                          | 24                    | 140.6      | 5.86        |         |           | 21                                                                                                              | 41.72      | 1.99        |         |           |
| Lack of fit                                                                                                                       | 4                     | 82.5       | 20.63       | 7.11    | 0.000992  | 2                                                                                                               | 29.90      | 14.95       | 24.04   | 6.237e-06 |
| Pure error                                                                                                                        | 20                    | 58.1       | 2.90        |         |           | 19                                                                                                              | 11.81      | 0.62        |         |           |
| Dependent variable= Lipid content % (w/w); R <sup>2</sup> = 0.9759; Adj R <sup>2</sup> = 0.9709, p-value= < e-15                  |                       |            |             |         |           | Dependent variable= Lipid content % (w/w); R <sup>2</sup> = 0.9432; Adj R <sup>2</sup> = 0.9296, p-value= <e-11 |            |             |         |           |
| Source                                                                                                                            | Biomass (g/L)         |            |             |         |           |                                                                                                                 |            |             |         |           |
|                                                                                                                                   | Degrees of Freedom    | Sum Square | Mean Square | F-Value | p-Value   | Degrees of Freedom                                                                                              | Sum Square | Mean Square | F-Value | p-Value   |
| FO(X1, X2)                                                                                                                        | 2                     | 23.91      | 11.97       | 69.94   | 1.128e-10 |                                                                                                                 | 14.03      | 7.01        | 49.52   | 1.122e-08 |
| TWI (X1, X2)                                                                                                                      | 1                     | 0.31       | 0.31        | 1.80    | 0.1919    | 1                                                                                                               | 0.24       | 0.24        | 1.70    | 0.2063    |
| PQ ( X1, X2)                                                                                                                      | 2                     | 42.61      | 21.30       | 122.84  | 2.467e-13 | 2                                                                                                               | 0.16       | 0.08        | 0.55    | 0.5834    |
| Residual                                                                                                                          | 24                    | 4.16       | 0.17        |         |           | 21                                                                                                              | 2.97       | 0.14        |         |           |
| Lack of fit                                                                                                                       | 4                     | 3.43       | 0.86        | 23.58   | 2.483e-07 | 2                                                                                                               | 2.37       | 0.19        | 37.48   | 2.539e-07 |
| Pure error                                                                                                                        | 20                    | 0.73       | 0.04        |         |           | 19                                                                                                              | 0.60       | 0.03        |         |           |
| Dependent variable= Biomass (g dcw/L); R <sup>2</sup> = 0.9414; Adj R <sup>2</sup> = 0.9292, p-value= <e-13                       |                       |            |             |         |           | Dependent variable= Biomass (g dcw/L); R <sup>2</sup> = 0.8291; Adj R <sup>2</sup> = 0.7884, p-value= <e-06     |            |             |         |           |
| FO, TWI, and PQ refer to the linear function, two-way interactions, and quadratic terms in the model formula of RSM respectively. |                       |            |             |         |           |                                                                                                                 |            |             |         |           |

206

207 ANOVA was performed to assess the significance and adequacy of response surface quadratic  
 208 models. The quality of the model fit can be evaluated by the coefficient of determination (R<sup>2</sup>),  
 209 which provides a measure of how much variability in the observed response values can be  
 210 explained by the experimental factors and their interactions. The R<sup>2</sup> value is always between 0  
 211 and 1 and the closer the R<sup>2</sup> value is to 1, the stronger the model is and the better it predicts the  
 212 response. For the developed models of *C. oleaginosus* and *Y. lipolytica*, the determination

213 confidence coefficients ( $R^2$ ) are 97.58 % and 94.32 % for lipid content, 94.14 % and 82.91 %  
214 for biomass. These  $R^2$  values represented that sample variation of the regression models  
215 described the experimental data accurately. The model is regarded as significant if the p-value  
216 is lower than 0.05. In other words, 'Model F-value' could occur because of noise with only a  
217 5% chance [33]. Therefore p-value of the models, for *C. oleaginosus*  $P_{\text{lipid accumulation}} = < e^{-15}$ ,  
218  $P_{\text{biomass}} = < e^{-13}$ , and for *Y. lipolytica*  $P_{\text{lipid accumulation}} = < e^{-11}$ , and  $P_{\text{biomass}} = < e^{-6}$  suggested the  
219 coefficients are significant. The Lack of Fit P-values showed that the Lack of Fit F-value could  
220 occur due to noise with the possibility of almost 0 % for the second model for *C. oleaginosus*  
221 and 0 % for all models for *Y. lipolytica*, and 0.0992 % for the first model of *C. oleaginosus*.

## 222 ***Response Surface Analysis***

223 The factors, C/N ratio of the growth medium, and temperature were selected to be optimized  
224 for *C. oleaginosus* and *Y. lipolytica*. Three-dimensional surface responses were plotted to  
225 illustrate the relationships between the responses and variables for *C. oleaginosus* (Figure 1)  
226 and *Y. lipolytica* (Figure 2). When the temperature was around 30 °C and the C/N ratio was  
227 between C/N 75 to C/N 220, the lipid accumulation of *C. oleaginosus* was improved (Figure 1-  
228 a). On the other hand, the biomass density increased within the range of C/N 60 to C/N 240 and  
229 from 25 °C to 30 °C (Figure 1-b). Additionally, lipid accumulation of *Y. lipolytica* was enhanced  
230 starting from C/N 100 and between 18 °C to 25 °C (Figure 2-a).

231 The optimal values for the investigated dependence factors were predicted from these 3D  
232 response surface plots (Figure 1 and Figure 2). Accordingly, the maximum predicted responses  
233 for *C. oleaginosus* were 47.67 % lipid accumulation and 6.26 g yeast dry cell weight/L. While  
234 the optimum C/N ratio and temperature were approximately C/N 175 and 30 °C for predicted  
235 lipid accumulation, C/N 185 and 25 °C were suggested to achieve the predicted maximum  
236 biomass density. The suggested optimum values for lipid accumulation resulted in  $51.50 \% \pm$   
237  $2.84$  lipid accumulation, and  $5.29 \pm 0.08$  g dry yeast cells/L which confirmed the predictions of

238 developed regression models (Table 6). Moreover, suggestions of RSM improved lipid  
239 accumulation by 9 % in *C. oleagnosus*. Regression models of *Y. lipolytica* predicted the  
240 optimum conditions as C/N 140 and 21 °C for maximum lipid production, which predicted  
241 18.33 % lipid accumulation, and 4.72 g yeast dry cell weight/L (Table 6). These predicted  
242 optimum conditions provided  $19.03 \pm 0.37$  lipid accumulation, and  $5.07 \pm 0.16$  g dry yeast  
243 cells/L for *Y. lipolytica*. Additionally, model predictions were validated via experiments at C/N  
244 45 and 30 °C for *C. oleagnosus* and C/N 180 at 21 °C for *Y. lipolytica* (Table 6).

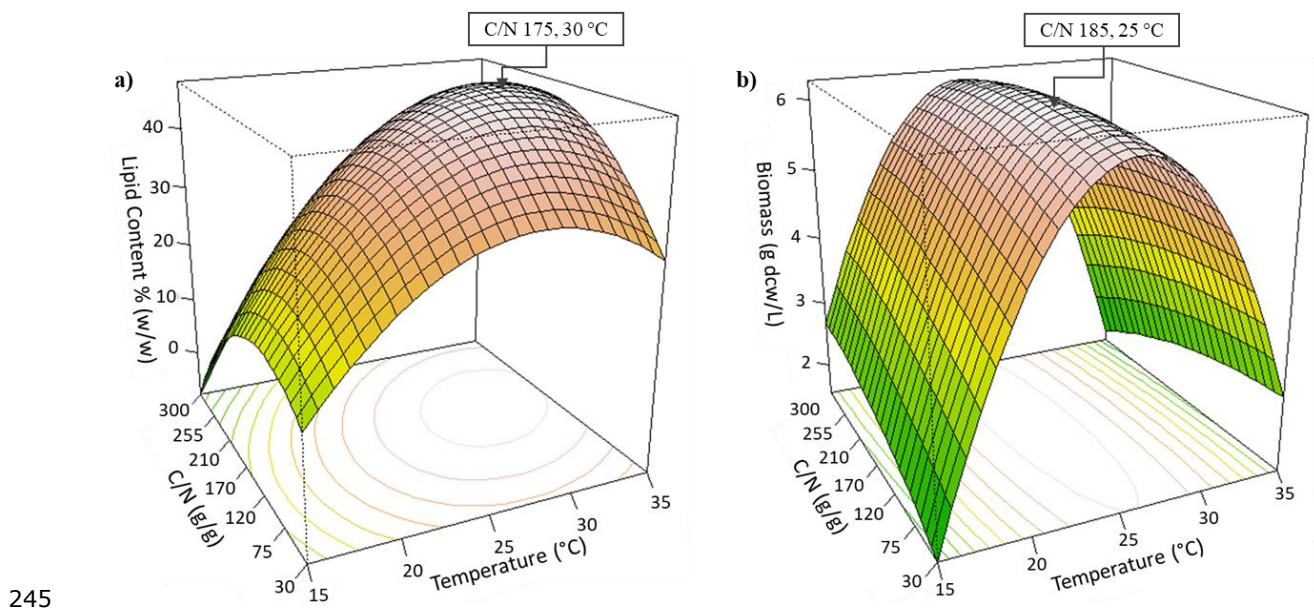

246 **Figure 1.** 3D Response surface plot of the combined effects of C/N ratio and temperature levels  
247 on a) lipid content (g lipid weight/g yeast dry cell weight), and b) growth (g yeast dry cell  
248 weight /L) of *C. oleagnosus*. Determined optima are highlighted in the respective plots.

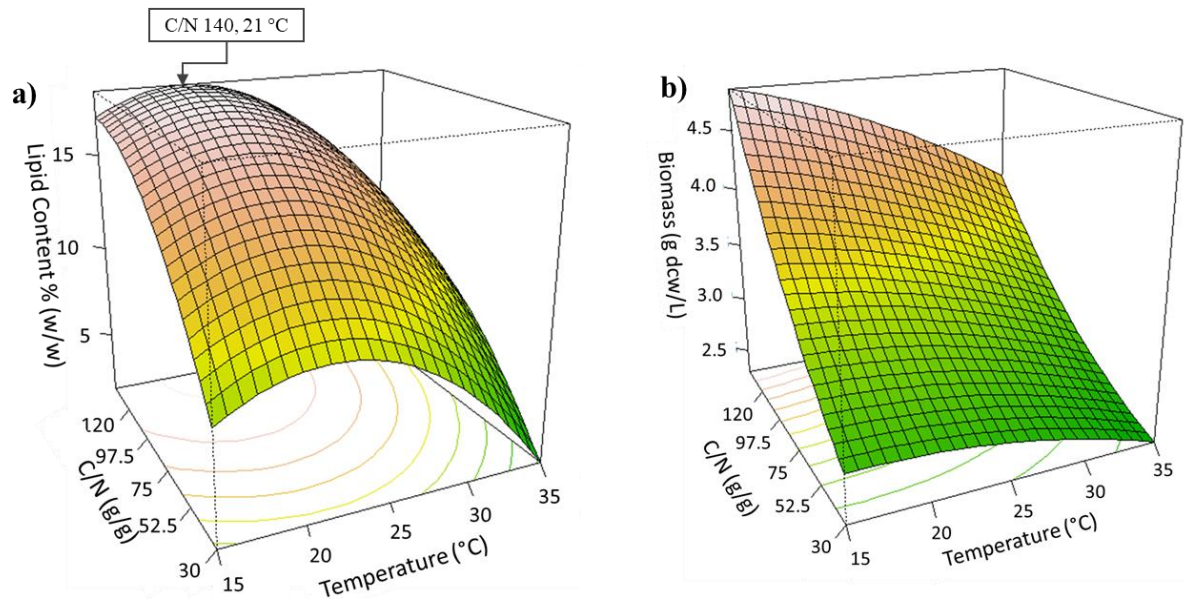

249

250 **Figure 2.** 3D Response surface plot of the combined effects of C/N ratio and temperature levels  
 251 on a) lipid content (g lipid weight/g yeast dry cell weight), and b) growth (g yeast dry cell  
 252 weight /L) of *Y. lipolytica*. Determined optima are highlighted in the respective plots.

253 **Table 6.** Validation of RSM models by suggested optimum conditions and additional  
 254 experiments.

|           |                  | <i>C. oleagnosus</i>       |               |                            |               |
|-----------|------------------|----------------------------|---------------|----------------------------|---------------|
|           |                  | Predicted Values           |               | Measured/Calculated Values |               |
| C/N (g/g) | Temperature (°C) | Lipid Accumulation (% g/g) | Biomass (g/L) | Lipid Accumulation (% g/g) | Biomass (g/L) |
| 45        | 30               | 36.08                      | 5.30          | 38.48 ± 1.61               | 5.28 ± 0.08   |
| 175       | 30               | 47.67                      | 4.97          | 51.17 ± 0.66               | 5.35 ± 0.28   |
|           |                  | <i>Y. lipolytica</i>       |               |                            |               |
|           |                  | Predicted Values           |               | Measured/Calculated Values |               |
| C/N (g/g) | Temperature (°C) | Lipid Accumulation (% g/g) | Biomass (g/L) | Lipid Accumulation (% g/g) | Biomass (g/L) |
| 140       | 21               | 18.33                      | 4.72          | 19.03 ± 0.37               | 5.07 ± 0.16   |
| 180       | 21               | 17.20                      | 5.81          | 17.72 ± 0.16               | 4.96 ± 0.16   |

255

256 ***Analysis of the fatty acid profile***

257 Principal Component Analysis (PCA) was conducted to clarify the variation in the fatty acid  
258 profile at different C/N ratios and temperatures. Produced the fatty acid compositions of *C.*  
259 *oleaginosus* and *Y. lipolytica* are represented in Table 7 and Table 8. The PCA showing the  
260 variation in the fatty acid profile is shown in Figure 3. As seen in Figure 3-a for *C. oleaginosus*  
261 the variance explained in PC1 and PC2 were 43 % and 22 % respectively and for *Y. lipolytica*  
262 (Figure 3-b) was 56 % and 20 %. As observed from Figure 3-a, the highest temperature (35 °C)  
263 and the combination of C/N 30 with the other tested temperatures (15 °C, 30 °C) caused a higher  
264 content of saturated and longer chain fatty acids (C20:0, C22:0, C24:0). *C. oleaginosus*  
265 produced higher content of unsaturated fatty acids (C18:1, C18:2, C18:3) at the lowest  
266 temperature, 15 °C. On the other hand, we observed the same effect on the fatty acid profile of  
267 *Y. lipolytica* in terms of saturation level and chain length by changing the temperature. *Y.*  
268 *lipolytica* produced higher content of C14:0, C16:0, C18:0, C20:0, and C24:0 when it was  
269 incubated at 35 °C, and C14:1, C16:1, C18:1, and C20:1 at 15 °C.



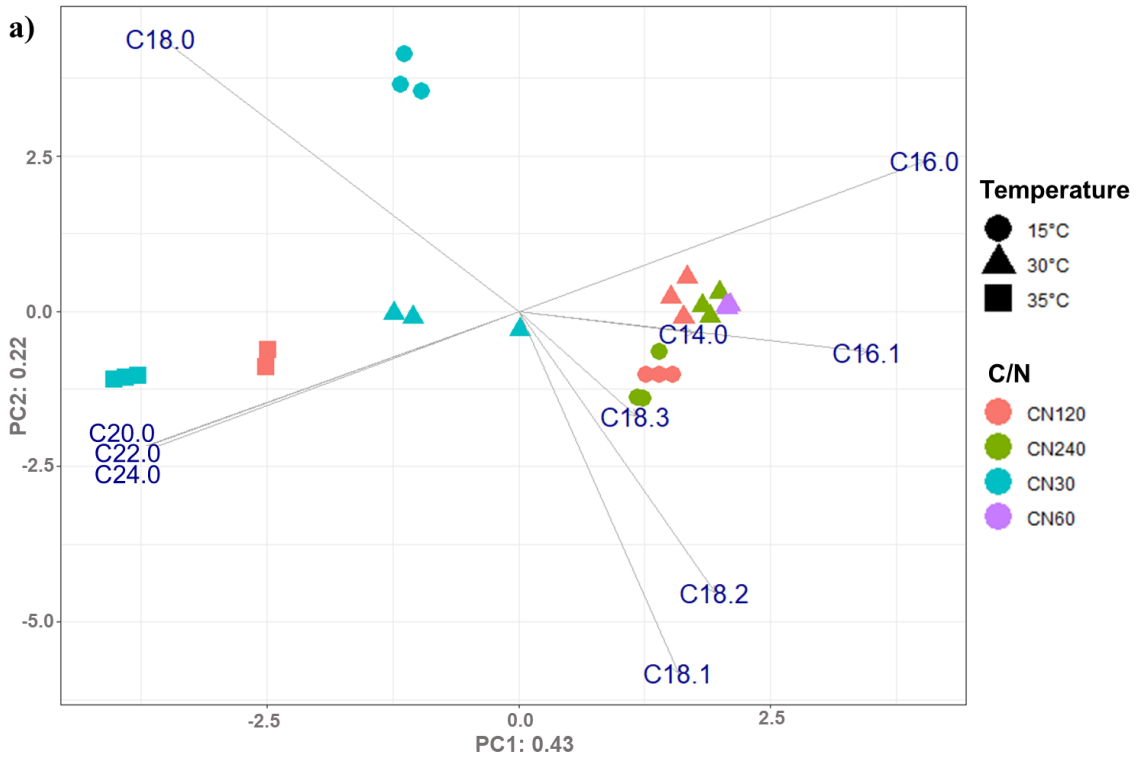

270

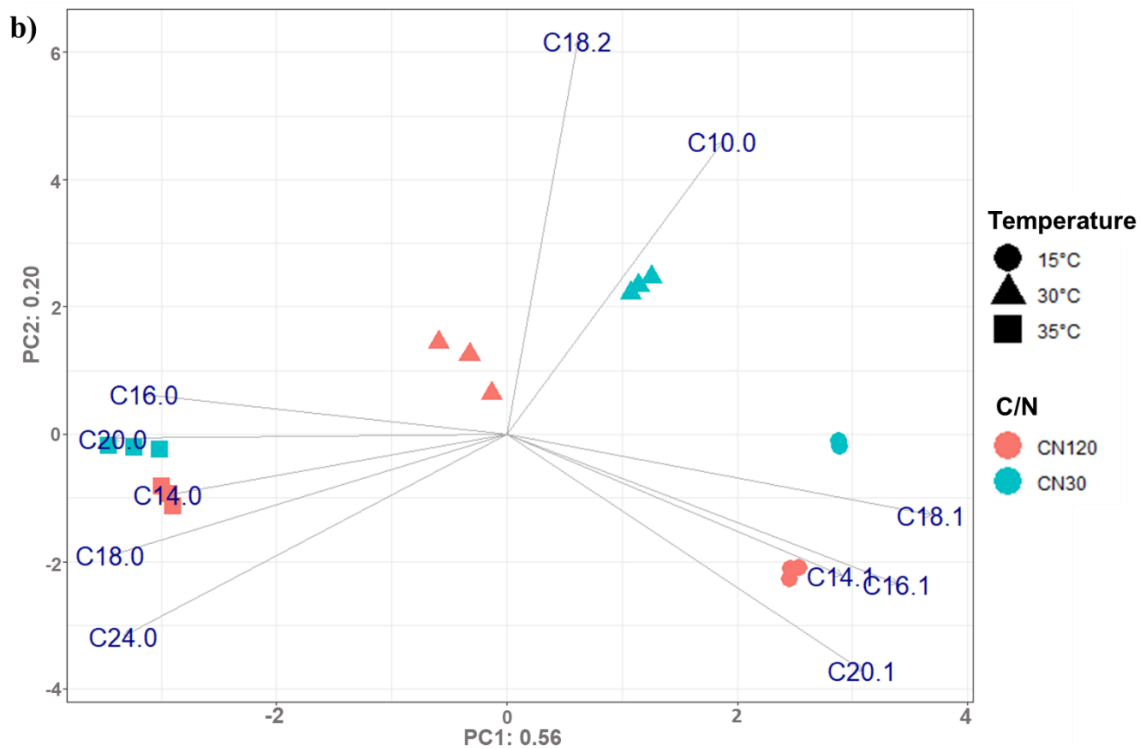

271

272 **Figure 3.** PCA on the fatty acid profile at different C/N ratios in the growth medium and  
273 temperatures for a) *C. oleaginosa* and b) *Y. lipolytica*. Variance explained by each component  
274 is given in the labels.

275 **Table 7.** Fatty acid profile of *C. oleagnosus* at various C/N ratios and temperatures.

| C/N (g/g) | Temperature (°C) | Fatty Acid Profile (%) |              |             |              |              |              |             |             |             |             |               |              |              |                |                     |
|-----------|------------------|------------------------|--------------|-------------|--------------|--------------|--------------|-------------|-------------|-------------|-------------|---------------|--------------|--------------|----------------|---------------------|
|           |                  | C14:0                  | C16:0        | C16:1       | C18:0        | C18:1        | C18:2        | C18:3       | C20:0       | C22:0       | C24:0       | Saturated FAs | MUFAs        | PUFAs        | Long chain FAs | Very long chain FAs |
| 30        | 15               | -                      | 24.62 ± 1.47 | -           | 43.92 ± 0.53 | 26.58 ± 1.09 | 4.88 ± 1.96  | -           | -           | -           | -           | 68.54 ± 1.47  | 26.58 ± 1.09 | 4.88 ± 1.96  | 100 ± 0.0      | -                   |
|           | 30               | -                      | 15.44 ± 3.06 | -           | 21.09 ± 4.22 | 46.70 ± 1.41 | 14.27 ± 1.93 | -           | -           | -           | 2.50 ± 0.54 | 39.03 ± 1.05  | 46.7 ± 1.41  | 14.27 ± 1.93 | 97.5 ± 0.54    | 2.5 ± 0.54          |
|           | 35               | -                      | 9.33 ± 0.58  | -           | 28.14 ± 0.80 | 42.52 ± 0.86 | 12.50 ± 0.81 | -           | 1.90 ± 0.17 | 1.27 ± 0.06 | 4.34 ± 0.06 | 44.98 ± 0.05  | 42.52 ± 0.86 | 12.50 ± 0.81 | 94.39 ± 0.0    | 5.61 ± 0.0          |
| 60        | 30               | -                      | 21.00 ± 1.67 | 1.09 ± 0.07 | 18.96 ± 2.74 | 51.06 ± 0.87 | 8.25 ± 0.91  | -           | -           | -           | -           | 39.96 ± 2.26  | 52.15 ± 1.36 | 8.25 ± 0.91  | 100 ± 0.0      | -                   |
| 120       | 15               | -                      | 18.32 ± 0.54 | 1.79 ± 0.43 | 10.74 ± 0.63 | 56.16 ± 1.64 | 10.74 ± 0.62 | 2.26 ± 0.24 | -           | -           | -           | 29.05 ± 0.24  | 57.95 ± 1.21 | 13.00 ± 0.97 | 100 ± 0.0      | -                   |
|           | 30               | 0.39 ± 0.03            | 30.33 ± 2.14 | 2.71 ± 0.23 | 7.39 ± 0.49  | 46.50 ± 1.98 | 11.93 ± 0.50 | -           | 0.44 ± 0.01 | -           | 0.30 ± 0.02 | 38.85 ± 2.57  | 49.22 ± 2.14 | 11.93 ± 0.50 | 99.7 ± 0.02    | 0.30 ± 0.02         |
|           | 35               | 0.40 ± 0.01            | 14.61 ± 0.11 | 0.71 ± 0.01 | 22.09 ± 0.22 | 47.85 ± 0.04 | 8.54 ± 0.18  | -           | 1.75 ± 0.06 | 1.13 ± 0.03 | 3.09 ± 0.00 | 43.34 ± 0.43  | 48.55 ± 0.03 | 8.54 ± 0.18  | 95.95 ± 0.08   | 4.22 ± 0.04         |
| 240       | 15               | -                      | 24.89 ± 2.20 | -           | -            | 59.08 ± 2.55 | 16.01 ± 0.82 | -           | -           | -           | -           | 24.89 ± 2.20  | 59.08 ± 2.55 | 16.01 ± 0.82 | 100 ± 0.0      | -                   |
|           | 30               | 0.38 ± 0.03            | 29.30 ± 1.46 | 2.88 ± 0.10 | 6.82 ± 0.19  | 47.23 ± 1.49 | 13.10 ± 0.33 | -           | -           | -           | 0.29 ± 0.03 | 36.79 ± 1.62  | 50.11 ± 1.51 | 13.10 ± 0.33 | 100 ± 0.0      | 0.29 ± 0.03         |

MUFAs: Monounsaturated fatty acids, PUFAs: Polyunsaturated fatty acids

277 **Table 8.** Fatty acid profile of *Y. lipolytica* at various C/N ratios and temperatures.

|                                                                        |                  | Fatty Acid Profile (%) |             |             |              |              |              |              |              |             |             |             |               |              |              |                |                     |
|------------------------------------------------------------------------|------------------|------------------------|-------------|-------------|--------------|--------------|--------------|--------------|--------------|-------------|-------------|-------------|---------------|--------------|--------------|----------------|---------------------|
| C/N (g/g)                                                              | Temperature (°C) | C10:0                  | C14:0       | C14:1       | C16:0        | C16:1        | C18:0        | C18:1        | C18:2        | C20:0       | C20:1       | C24:0       | Saturated FAs | MUFAs        | PUFAs        | Long chain FAs | Very long chain FAs |
| 30                                                                     | 15               | 1.27 ± 0.15            | -           | 0.68 ± 0.01 | 8.56 ± 0.34  | 13.41 ± 0.37 | 6.27 ± 0.70  | 46.54 ± 1.17 | 21.41 ± 0.01 | -           | 1.84 ± 0.32 | -           | 16.11 ± 1.20  | 62.48 ± 1.22 | 21.41 ± 0.01 | 98.72 ± 0.16   | -                   |
|                                                                        | 30               | 2.53 ± 0.31            | -           | -           | 10.59 ± 0.35 | 11.47 ± 0.68 | 5.57 ± 0.38  | 43.97 ± 0.88 | 24.67 ± 0.44 | 1.18 ± 0.10 | -           | -           | 19.88 ± 0.27  | 55.44 ± 0.21 | 24.67 ± 0.44 | 97.47 ± 0.31   | -                   |
|                                                                        | 35               | -                      | 1.02 ± 0.31 | -           | 18.77 ± 0.27 | 6.47 ± 0.18  | 14.94 ± 1.37 | 33.83 ± 0.13 | 19.14 ± 0.71 | 3.60 ± 0.27 | -           | 2.22 ± 0.04 | 40.56 ± 1.02  | 40.30 ± 0.31 | 19.14 ± 0.71 | 97.77 ± 0.04   | 2.22 ± 0.04         |
| 120                                                                    | 15               | -                      | -           | 0.30 ± 0.00 | 10.26 ± 0.10 | 19.98 ± 0.66 | 5.38 ± 0.25  | 50.21 ± 0.43 | 11.38 ± 0.20 | -           | 1.81 ± 0.03 | 0.68 ± 0.01 | 16.32 ± 0.40  | 72.29 ± 0.52 | 11.38 ± 0.20 | 99.32 ± 0.10   | 0.68 ± 0.01         |
|                                                                        | 30               | -                      | -           | -           | 23.31 ± 0.58 | 11.40 ± 1.37 | 7.81 ± 0.66  | 35.73 ± 1.06 | 21.74 ± 1.39 | -           | -           | -           | 31.12 ± 0.08  | 47.14 ± 1.30 | 21.75 ± 1.38 | 100 ± 0.00     | -                   |
|                                                                        | 35               | -                      | 0.29 ± 0.01 | -           | 20.97 ± 0.05 | 6.79 ± 0.24  | 22.14 ± 1.06 | 32.75 ± 1.23 | 12.72 ± 0.58 | 2.23 ± 0.14 | -           | 2.11 ± 0.13 | 47.73 ± 0.87  | 39.54 ± 1.42 | 12.72 ± 0.58 | 97.88 ± 0.13   | 2.11 ± 0.13         |
| MUFAs: Monounsaturated fatty acids, PUFAs: Polyunsaturated fatty acids |                  |                        |             |             |              |              |              |              |              |             |             |             |               |              |              |                |                     |

## 278 **Discussion**

279 The lipid accumulation and lipid productivity in oleaginous yeasts are strongly dependent on  
280 the composition of the cultivation medium and the operational conditions. Therefore, this study  
281 sought to assess the importance of such factors in lipid production. To this end, we performed  
282 an RSM analysis and represented the optimum C/N ratio and temperature for the maximization  
283 of lipid content, and biomass density. The optimum C/N ratio and temperature are C/N 175 at  
284 30°C for *C. oleaginosus* and C/N 140 at 21°C for *Y. lipolytica*. Moreover, we demonstrated that  
285 a C/N ratio and temperature cause variations in the fatty acid composition of oleaginous yeasts.

286 In the experiments performed for RSM, we used glycerol as a carbon source as this is efficiently  
287 utilized by *C. oleaginosus* and *Y. lipolytica* [34,35] and urea as a nitrogen source as it provides  
288 higher biomass yields compared to the ammonium salts [26]. RSM is one of the most preferred  
289 methods to optimize operational conditions and medium composition in biotechnology [36,37].

290 This method facilitates obtaining more information with a fewer number of experiments by  
291 changing multiple factors at a time because RSM reflects on the complex nonlinear  
292 relationships between independent variables and measured responses of the system. In contrast,  
293 the OFAT approach allows changing only one of the factors for each of the experiments.

294 Whereas around 15 experiments are required to follow the OFAT approach with the same  
295 factors and same levels, the number of experiments decreased by approximately 40 % via the  
296 DoE approach. The statistics tables of developed regression models in this study represented

297 that both the C/N ratio and the temperature have a significant effect on the lipid content of cells,  
298 and biomass density of *Y. lipolytica*. These results are similar to those reported by Canonico et  
299 al [17]. Although they utilized crude glycerol as a cultivation medium, the behavior of biomass  
300 and lipid content against changing temperature and C/N ratio is comparable with the results in  
301 this study. On the contrary, in this study, the growth of *C. oleaginosus* was significantly affected  
302 by only temperature and the combined effect of temperature and C/N ratio. These findings are

303 consistent with the report of Cui et al. even though they tested a narrower temperature range  
304 between 27 °C to 33 °C, whereas in our design, it was extended from 15 °C to 35 °C [27].  
305 Although the maximum lipid accumulation of *Y. lipolytica* is much less than *C. oleaginosus*, it  
306 is corresponding to the amounts reported for the wild-type strain [38,39]. Gao et al. reported  
307 lipid accumulation of *Y. lipolytica* CICC 31596 up to 30 % (g/g) when it grew on volatile fatty  
308 acids [40]. On the other hand, *Y. lipolytica* ACA-DC 50109 produced 20 % (g/g) lipids on a  
309 glycerol-based cultivation medium [34]. These findings show lipid accumulation of *Y.*  
310 *lipolytica* is strain-dependent. On the other hand, optimum temperature, 21 °C, for lipid  
311 accumulation and growth for *Y. lipolytica* identified in this study was surprisingly lower than  
312 previous reports. Our findings provided an optimum C/N ratio and temperature as these  
313 predicted values provided higher lipid contents, and biomass for both oleaginous yeasts. These  
314 optimum values identified via RSM in this study will potentially contribute to solving other  
315 optimization problems such as revealing the effect of other factors, and finding optimum  
316 conditions for other strains and engineered strains. In addition to optimization of cultivation  
317 conditions, lipid accumulation ability of *Y. lipolytica* and *C. oleaginosus* can be further  
318 improved by strain engineering as suggested in other reports [41].

319 In addition to the lipid content and biomass, the C/N ratio and temperature also affected the  
320 fatty acids composition of *C. oleaginosus* and *Y. lipolytica*. In previous studies, Moon et al.  
321 reported that 15 °C as a growth temperature shifted the fatty acid profile of *C. oleaginosus* to  
322 more unsaturated fatty acids [42]. Moreover, Hackenschmidt et al. claimed that there was only  
323 a slight variation in the fatty acid profile of *Y. lipolytica* from 25 °C to 35 °C [43]. However,  
324 systematic evaluation of the low and high levels of temperature and C/N ratio have not been  
325 performed to our knowledge. In this study, PCA allowed us to evaluate the variation in  
326 produced fatty acids composition by reducing the noise and creating uncorrelated components  
327 from the analyzed data. When the growth temperature of oleaginous yeasts was increased from

328 optimum to 35 °C and the C/N ratio decreased to C/N 30, the saturation level and the chain  
329 length of fatty acids were increased. On the other hand, fatty acids produced at 15 °C were  
330 slightly more unsaturated (C14:1, C16:1, C18:1, and C20:1 for *Y. lipolytica*, C18:1, C18:2, and  
331 C18:3 for *C. oleaginosus*) than they were at the optimum temperature. This variety can be  
332 explained by the adaptation of an organism to maintain lipid fluidity at different temperatures  
333 [42]. Because the saturation level and the chain length directly influence the melting point of  
334 fatty acids. The melting points are much lower for an unsaturated and shorter chain length of  
335 fatty acids whereas it is higher for saturated and longer chain fatty acids [44]. While low  
336 incubation temperatures increased unsaturation levels on both oleaginous yeasts, it decreased  
337 the growth and lipid productivity of *C. oleaginosus*. Unexpectedly, low incubation temperatures  
338 positively affected lipid accumulation and biomass production in *Y. lipolytica*. This situation  
339 demonstrated that *Y. lipolytica* is promising to produce fatty acids, especially with higher  
340 content of unsaturated fatty acids as growth and lipid accumulation were enhanced by lower  
341 temperature. Tezaki et al. related functions of some genes in *Y. lipolytica* with the adaptation  
342 ability of this organism at low temperatures [45]. Therefore, elucidation of the adaptation  
343 mechanism of oleaginous yeasts to low temperatures or too high temperatures could contribute  
344 to achieving higher productivity and expanding the application potential of microbial oils.

## 345 **Conclusion**

346 In this study, we sought to determine the major operational factors affecting physiological  
347 fitness toward fatty acid production by oleaginous yeasts. We aimed to enhance lipid  
348 accumulation as well as to enable *C. oleaginosus* and *Y. lipolytica* to attain higher content of  
349 particular fatty acids by changing operating conditions such as the available C/N ratio and  
350 temperature. We applied a thorough DoE method (RSM) and developed second-order  
351 polynomial equations to identify the optimum C/N ratios and temperatures for both oleaginous  
352 yeasts. The predictions of RSM improved the lipid accumulation by approximately 71 % for *C.*

353 *oleaginosus* and about 66 % for *Y. lipolytica* compared to the average lipid accumulation in the  
354 tested conditions. While the lipid accumulation was significantly affected by the C/N ratio and  
355 temperature, the growth of *C. oleaginosus* was mainly affected by temperature. Additionally,  
356 changing the C/N ratio in the cultivation medium and temperature resulted in variations in fatty  
357 acid profile, which we observed switches from saturated to unsaturated fatty acids, unsaturated  
358 to saturated fatty acids, and shorter chain to longer chain fatty acids. Altogether, these findings  
359 helped strengthen the basis to deploy these oleaginous yeasts as platforms for tailored fatty acid  
360 production and thereby contribute to the development of processes substituting palm oil that  
361 are more sustainable.

362 **Supplementary Material**

363 **a)**

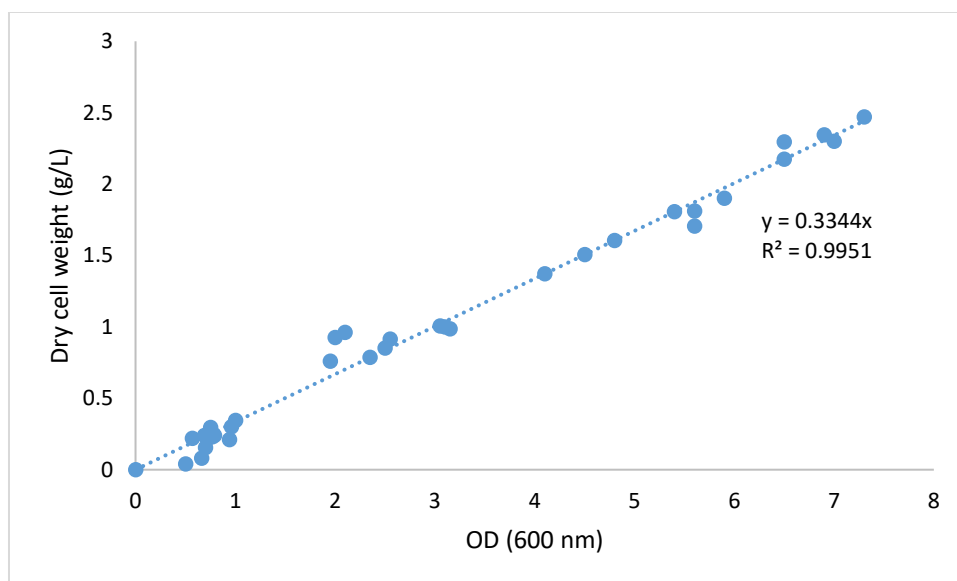

365 **b)**

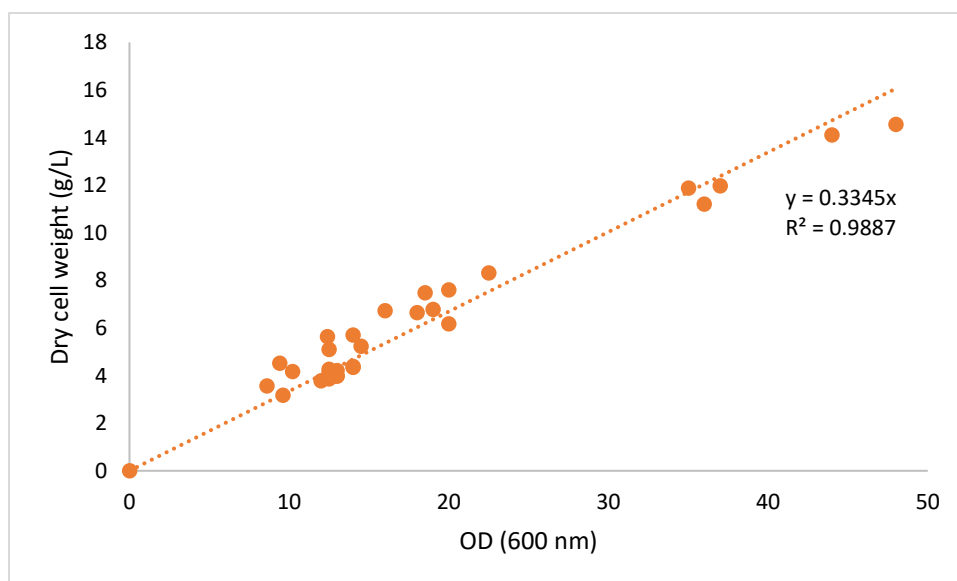

367 **Figure S1.** OD versus dry cell weight curve for a) *C. oleaginosus* and b) *Y. lipolytica*.



368 ***Author's contributions***

369 All authors conceived and designed the study. ZEDÖ and MSD performed the data analysis.  
370 ZEDÖ drafted the manuscript and performed the experiments. VAPMdS, JH, and MSD  
371 acquired project funding, conceived and supervised the research. All authors reviewed and  
372 edited the study. All authors read and approved the final manuscript.

373 ***Acknowledgments***

374 We thank Sara Moreno Paz for her valuable contribution to design of experiment and for  
375 providing the initial code for RSM. We thank Janine Verbokkem for her valuable contribution  
376 to the analysis of fatty acid composition.

377 ***Competing interests***

378 JH has interests in NoPalm Ingredients BV and VAPMdS has interests in LifeGlimmer GmbH.

379 ***Funding***

380 This research was financed by the Dutch Ministry of Agriculture through the “TKI-toeslag”  
381 project LWV19221 “Tailor-made microbial oils and fatty acids”.

382 ***Author details***

383 <sup>1</sup>Bioprocess Engineering, Wageningen University & Research, 6708 PB, Wageningen, the  
384 Netherlands. <sup>2</sup>Laboratory of Systems and Synthetic Biology, Wageningen University &  
385 Research, 6708 WE, Wageningen, the Netherlands. <sup>3</sup>LifeGlimmer GmbH, Berlin, 12163,  
386 Germany. <sup>4</sup>Wageningen Food & Biobased Research, Wageningen University & Research, 6708  
387 WE, Wageningen, The Netherlands.

388 **References**

- 389 1. Rustan AC, Drevon CA. Fatty Acids: Structures and Properties. *Encycl Life Sci.* 2005.
- 390 2. Holley RA, Patel D. Improvement in shelf-life and safety of perishable foods by plant  
391 essential oils and smoke antimicrobials. *Food Microbiol.* 2005.
- 392 3. P. Desbois A. Potential Applications of Antimicrobial Fatty Acids in Medicine, Agriculture  
393 and Other Industries. *Recent Pat Antiinfect Drug Discov.* 2012;
- 394 4. Abubakar A, Ishak MY, Makmom AA. Impacts of and adaptation to climate change on the  
395 oil palm in Malaysia: a systematic review. *Environ. Sci. Pollut. Res.* 2021.
- 396 5. Snashall GB, Poulos HM. Oreos versus orangutans: The need for sustainability  
397 transformations and nonhierarchical polycentric governance in the global palm oil industry.  
398 *Forests.* 2021.
- 399 6. Cazzolla Gatti R, Liang J, Velichevskaya A, Zhou M. Sustainable palm oil may not be so  
400 sustainable. *Sci Total Environ.* 2019;
- 401 7. Patel A, Karageorgou D, Rova E, Katapodis P, Rova U, Christakopoulos P, et al. An  
402 overview of potential oleaginous microorganisms and their role in biodiesel and omega-3  
403 fatty acid-based industries. *Microorganisms.* 2020.
- 404 8. Görner C, Redai V, Bracharz F, Schrepfer P, Garbe D, Brück T. Genetic engineering and  
405 production of modified fatty acids by the non-conventional oleaginous yeast *Trichosporon*  
406 *oleaginosus* ATCC 20509. *Green Chem.* 2016;
- 407 9. Beopoulos A, Nicaud JM, Gaillardin C. An overview of lipid metabolism in yeasts and its  
408 impact on biotechnological processes. *Appl. Microbiol. Biotechnol.* 2011.
- 409 10. Xue SJ, Chi Z, Zhang Y, Li YF, Liu GL, Jiang H, et al. Fatty acids from oleaginous yeasts

- 410 and yeast-like fungi and their potential applications. *Crit. Rev. Biotechnol.* 2018.
- 411 11. Ykema A, Verbree EC, van Verseveld HW, Smit H. Mathematical modelling of lipid  
412 production by oleaginous yeasts in continuous cultures. *Antonie Van Leeuwenhoek.*  
413 1986;52:491–506.
- 414 12. Carsanba E, Papanikolaou S, Erten H. Production of oils and fats by oleaginous  
415 microorganisms with an emphasis given to the potential of the nonconventional yeast  
416 *Yarrowia lipolytica*. *Crit Rev Biotechnol [Internet]. Informa Healthcare USA, Inc;*  
417 2018;38:1230–43. Available from: <https://doi.org/10.1080/07388551.2018.1472065>
- 418 13. Pham N, Reijnders M, Suarez-Diez M, Nijssse B, Springer J, Eggink G, et al. Genome-  
419 scale metabolic modeling underscores the potential of *Cutaneotrichosporon oleaginosus*  
420 ATCC 20509 as a cell factory for biofuel production. *Biotechnol Biofuels.* 2021;
- 421 14. Papanikolaou S, Aggelis G. Lipid production by *Yarrowia lipolytica* growing on industrial  
422 glycerol in a single-stage continuous culture. *Bioresour Technol.* 2002;
- 423 15. Dobrowolski A, Drzymała K, Mituła P, Mirończuk AM. Production of tailor-made fatty  
424 acids from crude glycerol at low pH by *Yarrowia lipolytica*. *Bioresour Technol.* 2020;314:0–  
425 3.
- 426 16. Ykema A, Verbree EC, Verwoert IIGS, van der Linden KH, Nijkamp HJJ, Smit H. Lipid  
427 production of revertants of Ufa mutants from the oleaginous yeast *Apiotrichum curvatum*.  
428 *Appl Microbiol Biotechnol.* 1990;
- 429 17. Canonico L, Ashoor S, Taccari M, Comitini F, Antonucci M, Truzzi C, et al. Conversion  
430 of raw glycerol to microbial lipids by new *Metschnikowia* and *Yarrowia lipolytica* strains.  
431 *Ann Microbiol.* 2016;
- 432 18. Zinjarde SS. Food-related applications of *Yarrowia lipolytica*. *Food Chem.* 2014.

- 433 19. Amalia L, Zhang YH, Ju YH, Tsai SL. Enhanced Lipid Production in *Yarrowia lipolytica*  
434 *Po1g* by Over-expressing *lro1* Gene under Two Different Promoters. *Appl Biochem*  
435 *Biotechnol.* 2020;
- 436 20. Koutinas AA, Chatzifragkou A, Kopsahelis N, Papanikolaou S, Kookos IK. Design and  
437 techno-economic evaluation of microbial oil production as a renewable resource for biodiesel  
438 and oleochemical production. *Fuel.* 2014;
- 439 21. Singh V, Haque S, Niwas R, Srivastava A, Pasupuleti M, Tripathi CKM. Strategies for  
440 fermentation medium optimization: An in-depth review. *Front. Microbiol.* 2017.
- 441 22. Ykema A, Verbree EC, Kater MM, Smit H. Optimization of lipid production in the  
442 oleaginous yeast *Apiotrichum curvatum* in wheypermeate. *Appl Microbiol Biotechnol.* 1988;
- 443 23. Seo Y hwan, Han S, Han JI. Economic biodiesel production using algal residue as  
444 substrate of lipid producing yeast *Cryptococcus curvatus*. *Renew Energy.* 2014;
- 445 24. Back A, Rossignol T, Krier F, Nicaud JM, Dhulster P. High-throughput fermentation  
446 screening for the yeast *Yarrowia lipolytica* with real-time monitoring of biomass and lipid  
447 production. *Microb Cell Fact.* 2016;
- 448 25. Sarabia LA, Ortiz MC, Sánchez MS. Response Surface Methodology. *Compr Chemom.*  
449 2020.
- 450 26. Awad D, Bohnen F, Mehlmer N, Brueck T. Multi-factorial-guided media optimization for  
451 enhanced biomass and lipid formation by the oleaginous yeast *Cutaneotrichosporon*  
452 *oleaginosus*. *Front Bioeng Biotechnol.* 2019;7.
- 453 27. Cui Y, Blackburn JW, Liang Y. Fermentation optimization for the production of lipid by  
454 *Cryptococcus curvatus*: Use of response surface methodology. *Biomass and Bioenergy.* 2012;
- 455 28. Meesters PAEP, Huijberts GNM, Eggink G. High-cell-density cultivation of the lipid

- 456 accumulating yeast *Cryptococcus curvatus* using glycerol as a carbon source. *Appl Microbiol*  
457 *Biotechnol.* 1996;45:575–9.
- 458 29. R Core Team. R software: Version 4.0.2. R Found Stat Comput. 2020;
- 459 30. Martins TG. Computing and visualizing PCA in R. R-bloggers. 2013;
- 460 31. Wickham H. ggplot2. Wiley Interdiscip Rev Comput Stat. 2011;
- 461 32. Lenth R V. Response-surface methods in R, using RSM. J Stat Softw. 2009;
- 462 33. Tan HT, Lee KT, Mohamed AR. Pretreatment of lignocellulosic palm biomass using a  
463 solvent-ionic liquid [BMIM]Cl for glucose recovery: An optimisation study using response  
464 surface methodology. *Carbohydr Polym.* 2011;
- 465 34. Makri A, Fakas S, Aggelis G. Metabolic activities of biotechnological interest in *Yarrowia*  
466 *lipolytica* grown on glycerol in repeated batch cultures. *Bioresour Technol* [Internet]. Elsevier  
467 Ltd; 2010;101:2351–8. Available from: <http://dx.doi.org/10.1016/j.biortech.2009.11.024>
- 468 35. Pham N, Reijnders M, Suarez-Diez M, Nijssse B, Springer J, Eggink G, et al. Genome-  
469 scale metabolic modeling underscores the potential of *Cutaneotrichosporon oleaginosus*  
470 ATCC 20509 as a cell factory for biofuel production. *Biotechnol Biofuels* [Internet]. BioMed  
471 Central; 2021;14:1–17. Available from: <https://doi.org/10.1186/s13068-020-01838-1>
- 472 36. Xu YX, Li YL, Xu SC, Liu Y, Wang X, Tang JW. Improvement of xylanase production  
473 by *Aspergillus niger* XY-1 using response surface methodology for optimizing the medium  
474 composition. *J Zhejiang Univ Sci B.* 2008;
- 475 37. Xu Y, Yang L, Zhao S, Wang Z. Large-scale production of tauroursodeoxycholic acid  
476 products through fermentation optimization of engineered *Escherichia coli* cell factory.  
477 *Microb Cell Fact.* 2019;

- 478 38. Fontanille P, Kumar V, Christophe G, Nouaille R, Larroche C. Bioconversion of volatile  
479 fatty acids into lipids by the oleaginous yeast *Yarrowia lipolytica*. *Bioresour Technol*  
480 [Internet]. Elsevier Ltd; 2012;114:443–9. Available from:  
481 <http://dx.doi.org/10.1016/j.biortech.2012.02.091>
- 482 39. Jia YL, Wang LR, Zhang ZX, Gu Y, Sun XM. Recent advances in biotechnological  
483 production of polyunsaturated fatty acids by *Yarrowia lipolytica*. *Crit. Rev. Food Sci. Nutr.*  
484 2021.
- 485 40. Gao R, Li Z, Zhou X, Bao W, Cheng S, Zheng L. Enhanced lipid production by *Yarrowia*  
486 *lipolytica* cultured with synthetic and waste-derived high-content volatile fatty acids under  
487 alkaline conditions. *Biotechnol Biofuels*. 2020;
- 488 41. Carsanba E, Papanikolaou S, Fickers P, Erten H. Lipids by *Yarrowia lipolytica* strains  
489 cultivated on glucose in batch cultures. *Microorganisms*. 2020;
- 490 42. Moon NJ, Hammond EG. Oil production by fermentation of lactose and the effect of  
491 temperature on the fatty acid composition1. *J Am Oil Chem Soc*. 1978;55:683–8.
- 492 43. Hackenschmidt S, Bracharz F, Daniel R, Thürmer A, Bruder S, Kabisch J. Effects of a  
493 high-cultivation temperature on the physiology of three different *Yarrowia lipolytica* strains.  
494 *FEMS Yeast Res*. 2019;19:1–11.
- 495 44. Fasina OO, Craig-Schmidt M, Colley Z, Hallman H. Predicting melting characteristics of  
496 vegetable oils from fatty acid composition. *LWT - Food Sci Technol*. 2008;
- 497 45. Tezaki S, Iwama R, Kobayashi S, Shiwa Y, Yoshikawa H, Ohta A, et al.  $\Delta$ 12-fatty acid  
498 desaturase is involved in growth at low temperature in yeast *Yarrowia lipolytica*. *Biochem*  
499 *Biophys Res Commun* [Internet]. Elsevier Ltd; 2017;488:165–70. Available from:  
500 <http://dx.doi.org/10.1016/j.bbrc.2017.05.028>
